# Supplementary material for: Childhood Threat Is Associated With Lower Resting-State Connectivity Within a Central Visceral Network
Source: PubMed Central journal article supplement (PMC8927539; doi:10.3389/fpsyg.2022.805049), 2022-03-03
Supplement: Data_Sheet_1.pdf [file Data_Sheet_1.pdf]

## *Supplementary Material*

### Supplementary Figures and Tables

Table S1. Participant Characteristics (n=100)

| <b>Characteristic</b>      | <b>Mean</b> | <b>S.D.</b> | <b>Range</b> |
|----------------------------|-------------|-------------|--------------|
| Age (years)                | 27.28       | 3.99        | 21-35        |
| CTQ Threat (abuse)         | 31.25       | 13.59       | 15-69        |
| CTQ Deprivation (neglect)  | 21.14       | 8.79        | 10-46        |
| CTQ total score            | 52.39       | 21.11       | 25-100       |
| THQ (age 0-11)             | 2.21        | 2.46        | 0-13         |
| THQ (age 12-17)            | 2.70        | 2.57        | 0-11         |
| Parental education level   | 5.29        | 2.04        | 1-8          |
| Education level            | 5.19        | 1.56        | 1-8          |
| BDI II total score         | 11.64       | 10.79       | 0-49         |
| PCL-C total                | 32.35       | 13.92       | 17-75        |
| Perceived stress           | 16.97       | 8.75        | 2-37         |
| STAI-T                     | 41.76       | 13.33       | 20-77        |
| NEO: Neuroticism (%)       | 36.86       | 10.18       | 13-59        |
| NEO: Extraversion (%)      | 39.54       | 7.96        | 12-56        |
| NEO: Openness (%)          | 33.58       | 4.73        | 19-42        |
| NEO: Agreeableness (%)     | 44.10       | 4.96        | 28-55        |
| NEO: Conscientiousness (%) | 43.88       | 7.42        | 20-59        |

CTQ = Childhood Trauma Questionnaire; THQ = Trauma History Questionnaire, Education Level = 0 - No high school diploma, 1 – GED, 2 – High school diploma, 3 – Technical training, 4 – Some college, no degree, 5 – Associate degree, 6 – Bachelor’s degree, 7 – Master’s degree, 8 – MD/PhD/JD/PharmD; BDI = Beck Depression Inventory; PCL-C = PTSD Checklist – Civilian Version; STAI-T = State-Trait Anxiety Inventory-Trait; NEO = NEO Personality Inventory

**RESULTS****Childhood Threat, Deprivation and Central Visceral Network Resting-state Connectivity**

Table S2. Early Traumatic Events (THQ, age 0-11): Examination of Potential Outliers

| THQ 0-11 Value | Mahalanobis's distance | Critical Value 5 IVs | Critical Value 8 IVs |
|----------------|------------------------|----------------------|----------------------|
| 13             | 26.77* <sup>#</sup>    | 20.52                | 26.13                |
| 12             | 21.93*                 | 20.52                | 26.13                |

\*Exceeds critical value for 5 Independent Variables (IVs); # Exceeds critical value for 8 IVs.

Table S3. Abbreviated Hierarchical Linear Regression Results without THQ 0-11 = 13

| Step | Variable        | BNST-PVN |        |          | Amygdala-sgACC |        |              | PVN-sgACC |        |              |
|------|-----------------|----------|--------|----------|----------------|--------|--------------|-----------|--------|--------------|
|      |                 | St. Beta | t      | <i>p</i> | St. Beta       | t      | <i>p</i>     | St. Beta  | t      | <i>p</i>     |
| 2    | <b>THQ 0-11</b> | -.143    | -1.363 | .176     | -.277          | -2.735 | <b>.007*</b> | -.279     | -2.895 | <b>.005*</b> |
| 3    | <b>THQ 0-11</b> | -.067    | -.581  | .562     | -.291          | -2.556 | <b>.012</b>  | -.250     | -2.322 | <b>.022</b>  |

Bold values indicate significance at  $p < 0.05$ ; an asterisk indicates survival of FDR correction (0.05) for six tests [Amygdala-sgACC (adjusted  $p = 0.021$ ); PVN-sgACC (adjusted  $p = 0.030$ )].

Table S4. Abbreviated Hierarchical Linear Regression Results without THQ 0-11 = 13 &amp; 12

| Step | Variable        | BNST-PVN |        |          | Amygdala-sgACC |        |             | PVN-sgACC |        |              |
|------|-----------------|----------|--------|----------|----------------|--------|-------------|-----------|--------|--------------|
|      |                 | St. Beta | t      | <i>p</i> | St. Beta       | t      | <i>p</i>    | St. Beta  | t      | <i>p</i>     |
| 2    | <b>THQ 0-11</b> | -.115    | -1.081 | .282     | -.207          | -1.979 | .051        | -.285     | -2.915 | <b>.004*</b> |
| 3    | <b>THQ 0-11</b> | -.060    | -.536  | .593     | -.223          | -2.000 | <b>.049</b> | -.258     | -2.493 | <b>.015</b>  |

Bold values indicate significance at  $p < 0.05$ ; an asterisk indicates survival of FDR correction (0.05) for six tests [PVN-sgACC (adjusted  $p = 0.024$ )].

Table S5. Hierarchical Linear Regression Results: Childhood Threat (CTQ Physical Abuse) and Central Visceral Network Resting-State Connectivity

| Step | Variable                  | PVN-sgACC |        |              |
|------|---------------------------|-----------|--------|--------------|
|      |                           | St. Beta  | t      | <i>p</i>     |
| 1    | Age                       | .113      | 1.166  | .247         |
|      | Race                      | -.038     | -.388  | .699         |
|      | Sex                       | .301      | 3.111  | <b>.002</b>  |
| 2    | Age                       | .139      | 1.386  | .169         |
|      | Race                      | .020      | .206   | .837         |
|      | Sex                       | .264      | 2.703  | <b>.008</b>  |
|      | <b>CTQ Physical Abuse</b> | -.255     | -2.309 | <b>.023*</b> |
|      | Socioeconomic Deprivation | .113      | 1.040  | .301         |
| 3    | Age                       | .173      | 1.517  | .133         |
|      | Race                      | .015      | .149   | .882         |
|      | Sex                       | .223      | 2.158  | <b>.034</b>  |
|      | <b>CTQ Physical Abuse</b> | -.212     | -1.805 | .074         |
|      | Socioeconomic Deprivation | .126      | 1.063  | .290         |
|      | THQ >18                   | -.006     | -.051  | .959         |
|      | Adulthood SES             | -.018     | -.175  | .861         |
|      | Negative Life Events      | -.149     | -1.267 | .208         |

Bold values indicate significance at  $p < 0.05$ ; an asterisk indicates survival of FDR correction (0.05) for three tests.

Table S6. Regression Results: Childhood Threat (CTQ Sexual Abuse) and Central Visceral Network Resting-State Connectivity

| Step                 | Variable                  | PVN-sgACC |        |              |
|----------------------|---------------------------|-----------|--------|--------------|
|                      |                           | St. Beta  | t      | <i>p</i>     |
| 1                    | Age                       | .113      | 1.166  | .247         |
|                      | Race                      | -.038     | -.388  | .699         |
|                      | Sex                       | .301      | 3.111  | <b>.002</b>  |
| 2                    | Age                       | .142      | 1.428  | .156         |
|                      | Race                      | -.013     | -.134  | .894         |
|                      | Sex                       | .292      | 3.054  | <b>.003</b>  |
|                      | <b>CTQ Sexual Abuse</b>   | -.250     | -2.513 | <b>.014*</b> |
|                      | Socioeconomic Deprivation | .074      | .728   | .469         |
| 3                    | Age                       | .193      | 1.714  | .090         |
|                      | Race                      | -.010     | -.100  | .921         |
|                      | Sex                       | .228      | 2.247  | <b>.027</b>  |
|                      | <b>CTQ Sexual Abuse</b>   | -.248     | -2.480 | <b>.015*</b> |
|                      | Socioeconomic Deprivation | .108      | .971   | .334         |
|                      | THQ >18                   | .001      | .006   | .995         |
|                      | Adulthood SES             | -.039     | -.380  | .705         |
| Negative Life Events | -.205                     | -1.815    | .073   |              |

Bold values indicate significance at  $p < 0.05$ ; an asterisk indicates survival of FDR correction (0.05) for three tests.

**Later Traumatic Events (THQ, age 12-17)**

Six resting-state ROI-to-ROI connections were examined (Amygdala-BNST, Amygdala-PVN, Amygdala-sgACC, BNST-PVN, BNST-sgACC and PVN-sgACC). Of these, THQ 12-17 had a significant, negative association with Amygdala-sgACC ( $\beta = -0.218$ ;  $p = 0.044$ ) and PVN-sgACC connectivity ( $\beta = -0.220$ ;  $p = 0.034$ ). Neither relationship survived multiple comparison correction; neither relationship remained significant when adulthood trauma (age >18), adulthood SES and negative life events were added to the model, Table S7). Socioeconomic deprivation (SED, maximum parental education level reverse coded) did not have a significant effect on any ROI-to-ROI connection examined.

Table S7. Hierarchical Linear Regression Results: Childhood Threat (Later Traumatic Events, age 12-17) and Central Visceral Network Resting-State Connectivity

| Step                 | Variable                  | Amygdala-sgACC |        |             | PVN-sgACC |        |             |
|----------------------|---------------------------|----------------|--------|-------------|-----------|--------|-------------|
|                      |                           | St. Beta       | t      | p           | St. Beta  | t      | p           |
| 1                    | Age                       | -.036          | -.358  | .721        | .113      | 1.166  | .247        |
|                      | Race                      | -.177          | -1.750 | .083        | -.038     | -.388  | .699        |
|                      | Sex                       | .007           | .068   | .946        | .301      | 3.111  | <b>.002</b> |
| 2                    | Age                       | -.056          | -.540  | .590        | .111      | 1.111  | .269        |
|                      | Race                      | -.145          | -1.436 | .154        | -.009     | -.093  | .926        |
|                      | Sex                       | .042           | .416   | .678        | .327      | 3.370  | <b>.001</b> |
|                      | <b>THQ 12-17</b>          | -.218          | -2.041 | <b>.044</b> | -.220     | -2.154 | <b>.034</b> |
|                      | Socioeconomic Deprivation | .153           | 1.374  | .173        | .090      | .849   | .398        |
| 3                    | Age                       | -.025          | -.203  | .840        | .159      | 1.379  | .171        |
|                      | Race                      | -.147          | -1.423 | .158        | -.016     | -.165  | .869        |
|                      | Sex                       | .044           | .392   | .696        | .284      | 2.656  | <b>.009</b> |
|                      | <b>THQ 12-17</b>          | -.225          | -1.880 | .063        | -.187     | -1.646 | .103        |
|                      | Socioeconomic Deprivation | .144           | 1.211  | .229        | .085      | .747   | .457        |
|                      | THQ >18                   | -.067          | -.528  | .599        | -.028     | -.233  | .816        |
|                      | Adulthood SES             | -.060          | -.539  | .591        | -.080     | -.764  | .447        |
| Negative Life Events | .015                      | .117           | .907   | -.123       | -1.003    | .319   |             |

Bold values indicate significance at  $p < 0.05$ ; THQ 12-17 effects did not survive FDR correction (0.05) for six tests.

Table S8. Relationships between Childhood Adversity and Affective Symptoms (n=100).

|                                        |          | <b>CTQ Threat</b> | <b>THQ 0-11</b> | <b>THQ 12-17</b> | <b>CTQ Deprivation</b> | <b>SED</b> | <b>BDI-II</b> | <b>PCL-C</b> | <b>Lifetime Diagnoses</b> |
|----------------------------------------|----------|-------------------|-----------------|------------------|------------------------|------------|---------------|--------------|---------------------------|
| <b>CTQ Threat</b>                      | r        | --                |                 |                  |                        |            |               |              |                           |
|                                        | <i>p</i> |                   |                 |                  |                        |            |               |              |                           |
| <b>THQ 0-11</b>                        | r        | .535**            | --              |                  |                        |            |               |              |                           |
|                                        | <i>p</i> | .000              |                 |                  |                        |            |               |              |                           |
| <b>THQ 12-17</b>                       | r        | .580**            | .539**          | --               |                        |            |               |              |                           |
|                                        | <i>p</i> | .000              | .000            |                  |                        |            |               |              |                           |
| <b>CTQ Deprivation</b>                 | r        | .769**            | .462**          | .534**           | --                     |            |               |              |                           |
|                                        | <i>p</i> | .000              | .000            | .000             |                        |            |               |              |                           |
| <b>Socioeconomic Deprivation (SED)</b> | r        | .411**            | .175            | .337**           | .404**                 | --         |               |              |                           |
|                                        | <i>p</i> | .000              | .081            | .001             | .000                   |            |               |              |                           |
| <b>BDI-II</b>                          | r        | .511**            | .331**          | .322**           | .489**                 | .340**     | --            |              |                           |
|                                        | <i>p</i> | .000              | .001            | .001             | .000                   | .001       |               |              |                           |
| <b>PCL-C</b>                           | r        | .556**            | .463**          | .345**           | .544**                 | .300**     | .850**        | --           |                           |
|                                        | <i>p</i> | .000              | .000            | .000             | .000                   | .002       | .000          |              |                           |
| <b>Lifetime diagnoses</b>              | r        | .637**            | .484**          | .392**           | .621**                 | .378**     | .672**        | .696**       | --                        |
|                                        | <i>p</i> | .000              | .000            | .000             | .000                   | .000       | .000          | .000         |                           |

\*\* . Pearson correlation is significant at the 0.01 level (2-tailed).
